# Supplementary material for: Anodic Stripping Voltammetric Analysis of Trace Arsenic(III) on a Au-Stained Au Nanoparticles/Pyridine/Carboxylated Multiwalled Carbon Nanotubes/Glassy Carbon Electrode
Source: MDPI journal article supplement (doi:10.3390/nano12091450), 2022-04-24
Supplement: s1 [file s1]

## Supporting Information

# Anodic Stripping Voltammetric Analysis of Trace Arsenic(III) on a Au-Stained Au Nanoparticles/Pyridine/Carboxylated Multiwalled Carbon Nanotubes/Glassy Carbon Electrode

Yun Du <sup>1,2</sup>, Chenglong Sun <sup>1</sup>, Yuru Shen <sup>1</sup>, Luyao Liu <sup>1</sup>, Mingjian Chen <sup>1</sup>, Qingji Xie <sup>1,\*</sup> and Hongbo Xiao <sup>3,\*</sup>

- <sup>1</sup> Key Laboratory of Chemical Biology & Traditional Chinese Medicine Research, Ministry of Education of China, College of Chemistry and Chemical Engineering, Hunan Normal University, Changsha 410081, China; hello\_dudu1990@163.com (Y.D.); 15588654717@163.com (C.S.); shenyuru163@163.com (Y.S.); lly19970214@163.com (L.L.); mingjian412@163.com (M.C.)
- <sup>2</sup> Changsha Center for Diseases Prevention and Control, Changsha 410004, China
- <sup>3</sup> College of Science, Central South University of Forestry and Technology, Changsha 410004, China
- \* Correspondence: xiejq@hunnu.edu.cn (Q.X.), [anabeel@126.com](mailto:anabeel@126.com) (H.X.)

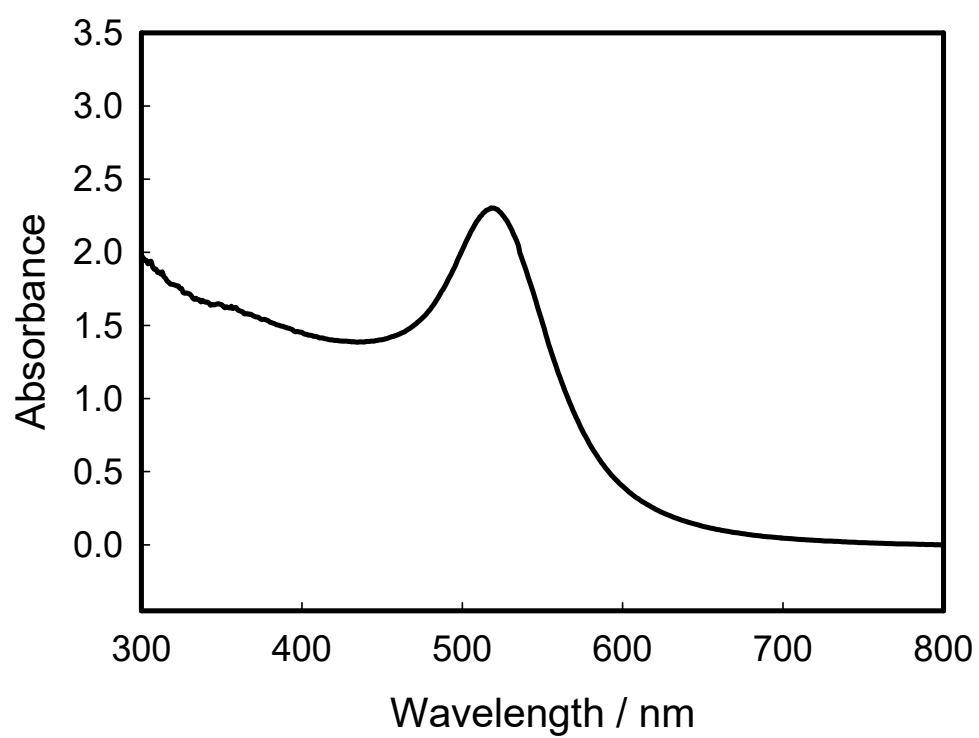

**Figure S1.** UV-Vis spectrum of the AuNPs.

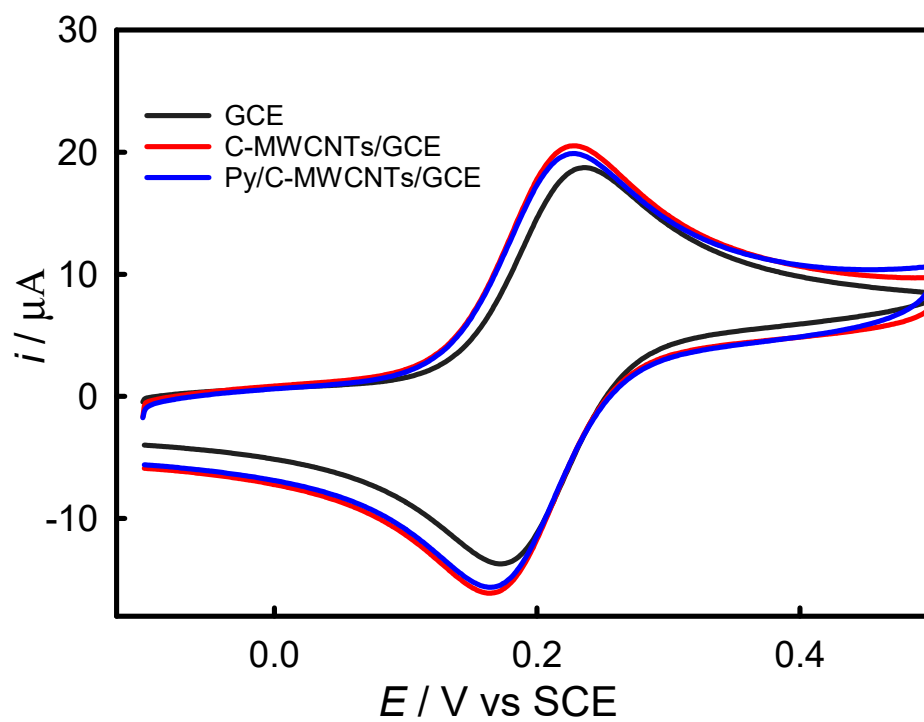

**Figure S2.** CV curves on GCE, C-MWCNTs/GCE and Py/C-MWCNTs/GCE in 0.1 M PBS containing 1.0 mM  $\text{K}_4\text{Fe}(\text{CN})_6$  at pH 7.0.

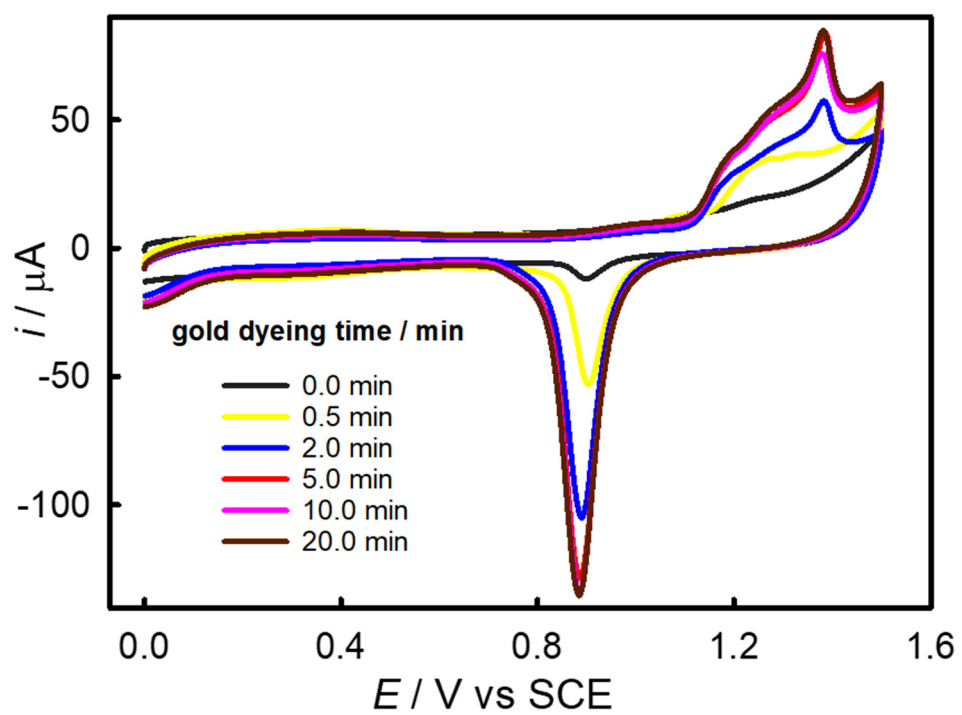

**Figure S3.** CV curves on Au/Py/C-MWCNTs/GCE prepared at different gold staining time. Scan rate: 50  $\text{mV s}^{-1}$ .

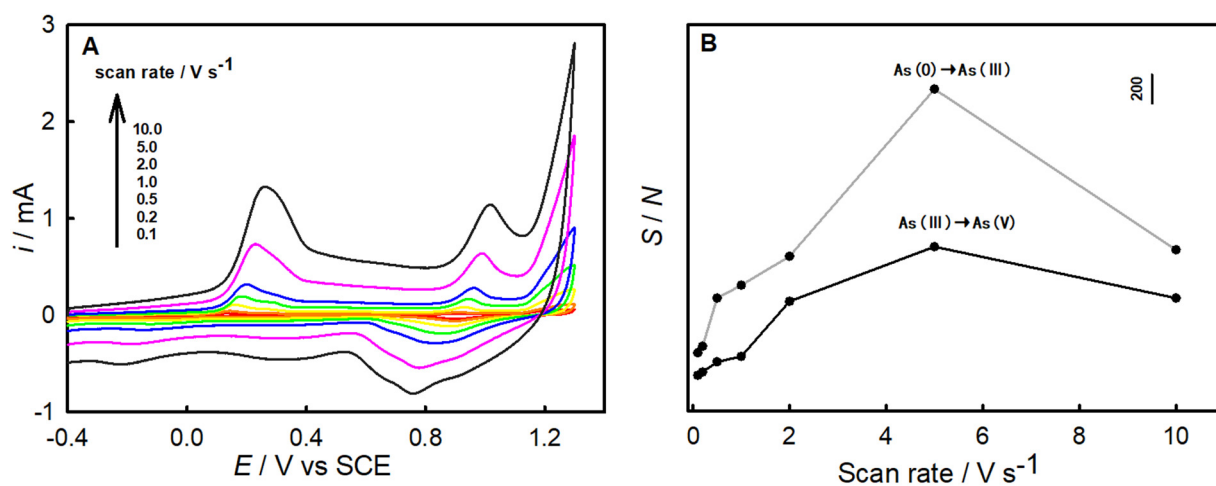

**Figure S4.** (A) CV curves on  $\text{Au}_s/\text{Py}/\text{C-MWCNTs}/\text{GCE}$  in  $0.1\text{ M}$  aqueous  $\text{H}_2\text{SO}_4$  containing  $1.0\text{ }\mu\text{M}$   $\text{As(III)}$  at different scan rates, (B) the associated  $S/N$  plots of  $\text{As(0)} \rightarrow \text{As(III)}$  (grey) and  $\text{As(III)} \rightarrow \text{As(V)}$  (black) *vs* scan rate,  $S$ : peak current,  $N$ : noise of the background current. The experiments were conducted after preconcentration at  $-0.40\text{ V}$  for  $7\text{ min}$ .

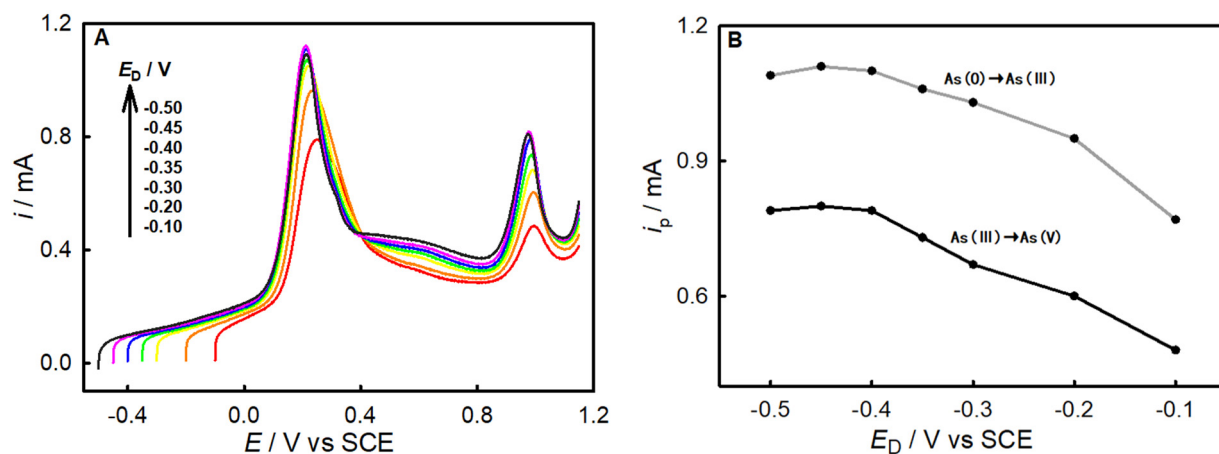

**Figure S5.** LSASV responses (A) on Au<sub>s</sub>/Py/C-MWCNTs/GCE in 0.1 M aqueous H<sub>2</sub>SO<sub>4</sub> containing 1.0 μM As(III) at various As(0)-deposition potential ( $E_D$ ) values and the corresponding peak currents versus  $E_D$  (B). As(0)-deposition time ( $t_D$ ) = 7 min.

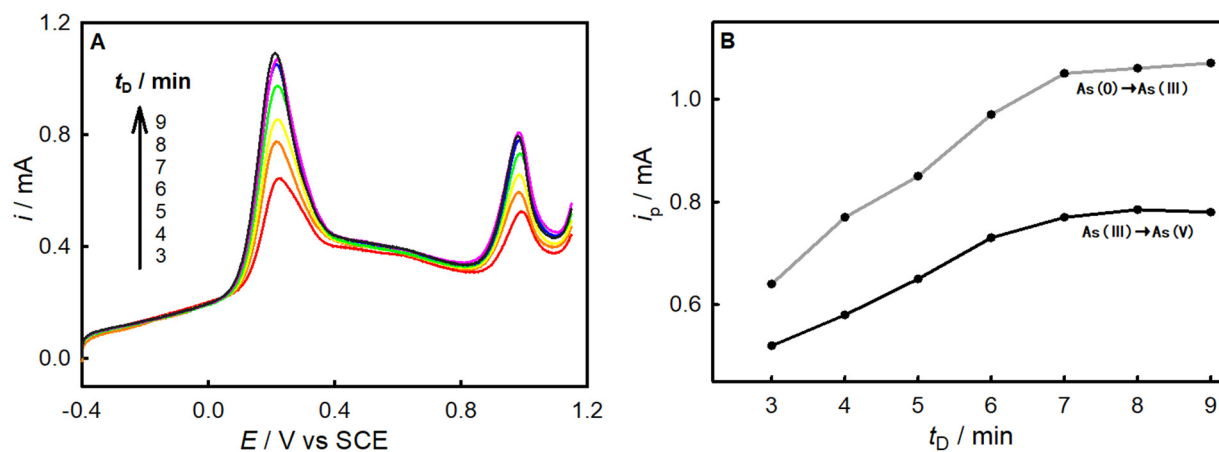

**Figure S6.** LSASV responses (A) on Au<sub>s</sub>/Py/C-MWCNTs/GCE in 0.1 M aqueous H<sub>2</sub>SO<sub>4</sub> containing 1.0 μM As(III) for various As(0)-deposition time ( $t_D$ ) and the corresponding peak currents versus  $t_D$  (B).  $E_D = -0.40$  V.

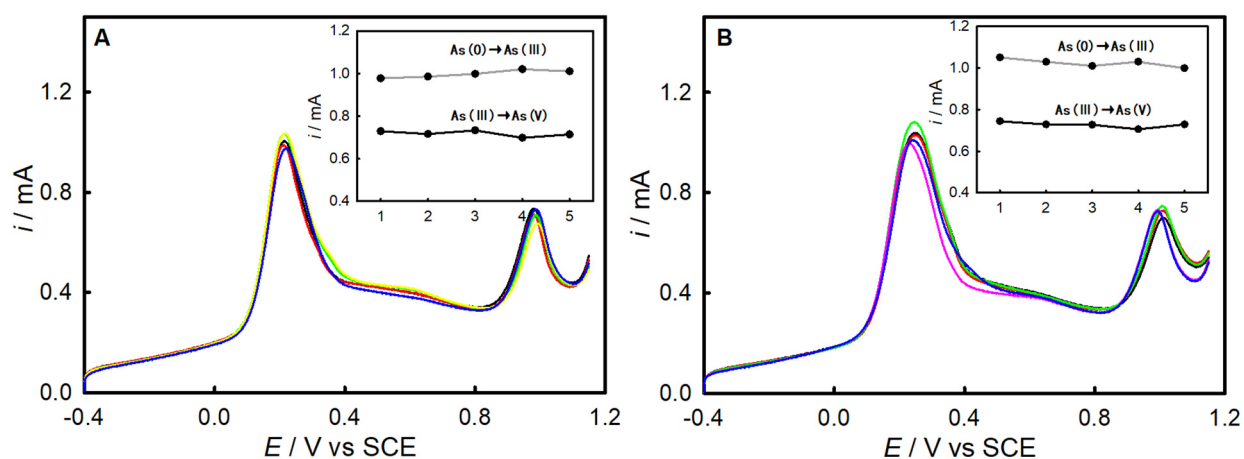

**Figure S7.** Stability and reproducibility of LSASV response of 1.0  $\mu\text{M}$  As(III). (A) Repeated five times on one  $\text{Au}_s/\text{Py}/\text{C-MWCNTs}/\text{GCE}$  in 0.1 M aqueous  $\text{H}_2\text{SO}_4$ , (B) On a batch of five different  $\text{Au}_s/\text{Py}/\text{C-MWCNTs}/\text{GCE}$ s.  $E_D = -0.40$  V,  $t_D = 7$  min.



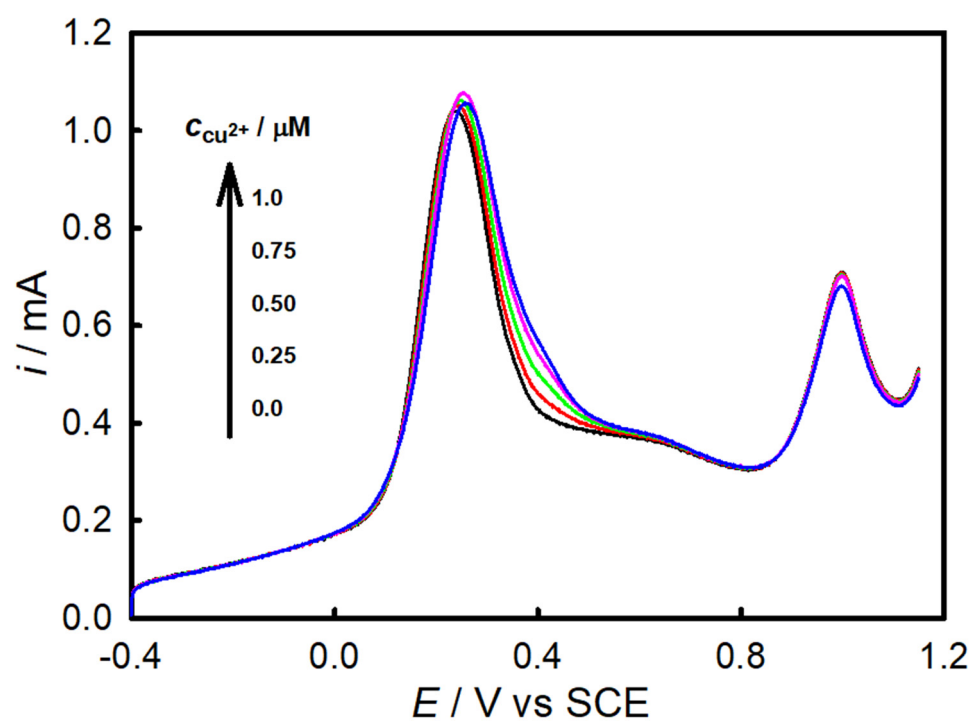

**Figure S8.** LSASV response on  $Au_s/Py/C-MWCNTs/GCE$  in 0.1 M aqueous  $H_2SO_4$  containing 1.0  $\mu M$  As(III) with an interval addition of 0.25  $\mu M$   $Cu^{2+}$ .  $E_D = -0.40$  V,  $t_D = 7$  min.
